# Supplementary material for: Repurposing cephalosporin antibiotics as pro-senescent radiosensitizers
Source: PubMed Central journal article supplement (PMC5085128; doi:10.18632/oncotarget.8984), 2016-04-25
Supplement: oncotarget-07-33919-s001.pdf [file oncotarget-07-33919-s001.pdf]

# Repurposing cephalosporin antibiotics as pro-senescent radiosensitizers

## Supplementary Material

A

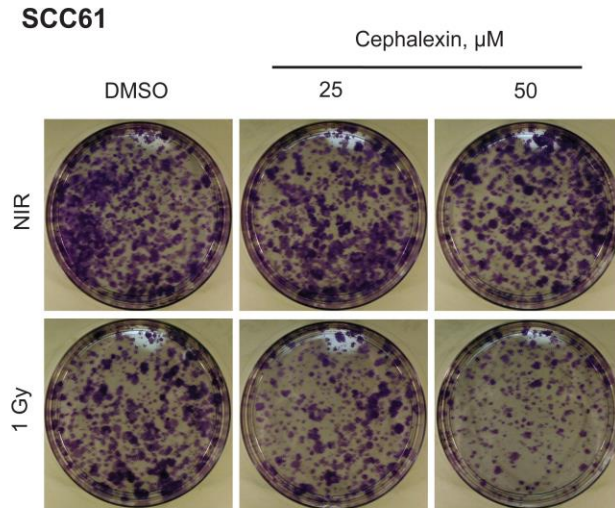

B

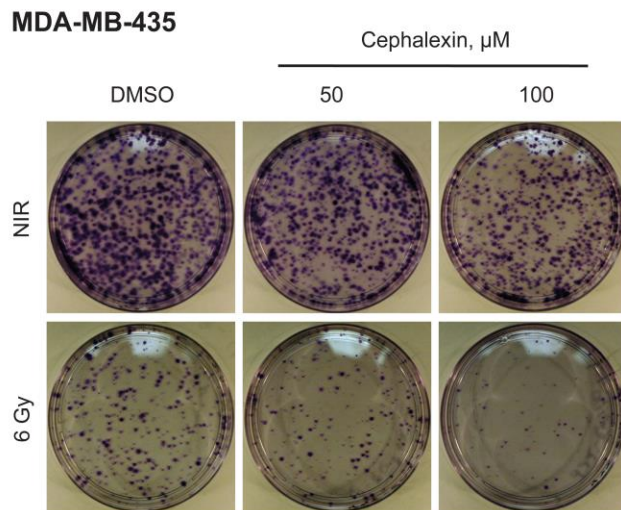

**Figure S1:** Cephalexin suppresses colony formation in irradiated MDA-MB-435 breast cancer and SCC61 head and cancer cell lines. Cells were untreated or treated with cephalexin 1 hour prior irradiation. Cell survival was evaluated after 14 days. Cells were fixed with ice-cold methanol and stained with crystal violet (0.5% w/v). Representative images of clonogenic assay plates are shown.
